# Supplementary material for: Immune-Related Gene Profiles and Differential Expression in the Grey Garden Slug Deroceras reticulatum Infected with the Parasitic Nematode Phasmarhabditis hermaphrodita
Source: MDPI journal article supplement (doi:10.3390/insects15050311), 2024-04-26
Supplement: s1 [file s1]

**Table S1.** List of primers used in this study for qRT-PCR.

| Gene name                      | Forward (5'-3')         | Reverse (5-3')          |
|--------------------------------|-------------------------|-------------------------|
| C-type lectin (CTL)            | TGGACCCCAGTTTGTGTAAGAG  | TACAAGTATATGGGTTGGCGGT  |
| C-type lectin (CTL)/(CTLD)     | TATATGCAGCGTCATCGTCAGA  | AGCATCAACCCAACTCATCACT  |
| Scavenger receptor (SR)        | ACACTGGATAATGCTATTGCGC  | GTCGTATTCAGGGAGGCAGATT  |
| Perlucin-like protein          | AGTCCAGTGATGACAGTGTGTT  | GTGAGACAATGATGACAGAGCG  |
| Akirin-2                       | ATCAGTTACAGAAGCGCTTTGG  | CAATCTCCTTTCTCCTGAGGCA  |
| Kunitz_textilinin-like         | AGCCAACCTATTTTTGCGGC    | GCGTGAAGACAGTTGTGGTG    |
| Sialic acid-binding lectin 3   | CCACAGGCCTTCTTAGCAATTT  | CTCTGTGAACGTAGCAGAAACA  |
| Immune-associated (IA)         | TAAAGTTGAAGGGACCAGGACA  | GACAGTTCCAAGTCCCTTCAGT  |
| Dual oxidase (Duox)            | TTCAAGGCTTTTTGGTTGACCC  | AAACCAGGAAAACAGAGGAGCT  |
| Toll-like receptor 4           | TGGTACAACCTTCTGCAACAGGA | ATGTTGTTCAAAGGGCGTGTTT  |
| CD109 antigen                  | CTTCACTTTATTGCACTCCCCG  | TGGAGTCACTGTCCAACAAGTT  |
| C-type lectin (CTL)            | AAGACTCAATTGGTTCGCCTCT  | TGTTTTATTTTCGCTCACCAGCC |
| Signal transducer              | GAAAACCTCCTGGCAAAGTCCAC | GTTTGCTGTAATTTGGGCGTTG  |
| Immunoglobulin domain          | AAATGAACTCCGCCTGTACAGT  | TGTAGAATAGCGCCCTTTGTCA  |
| Sialic acid-binding (Siglec-8) | CTCAATAGTTTCAGCGTATGGGC | GCCTCGTCCTGATAGTAACTGAA |
| Bactericidal/Permeability-IP   | CGAATGTCAACATTGCTCTCAGT | CAAAATTTTGTAGCTTGCTCGCC |
| CD109 antigen-like gene        | AGAGAAATCCTTCTGGTGGCTTT | ATTAAGGTTTGTGTGCGGTCTGA |
| Contactin-like Immunoglobulin  | ACATTTACAGACACCGTCTCTAT | CAGTATCTGGCCCTCTGTTGTAA |
| Dret-Rpt6                      | TGCTGGAGCTCTTGAACCAG    | TTCTTCCCGGACGCAAAAGA    |
